# Supplementary material
Source: publisher figshare collection journal article supplement (https://gsajournals.figshare.com/articles/dataset/_/6480419)
Supplement: Supplementary file 1 [file 1]

## Sheet: dos-2
Strain Name	Time	#Paralysed	#Total	#Paralysed	#Total	#Paralysed	#Total
N2	0	0	15	0	15	0	15
	60	0	15	0	15	0	15
	120	0	15	0	15	2	15
	180	6	15	2	15	9	15
	240	7	15	10	15	12	15
	300	10	15	14	15	14	15
	360	13	15	14	15	14	15
	420	15	15	15	15	14	15
dos-2	0	0	16	0	17	0	16
	60	0	16	0	17	0	16
	120	0	16	3	17	2	16
	180	6	16	5	17	7	16
	240	10	16	11	17	11	16
	300	14	16	15	17	15	16
	360	15	16	15	17	16	16
	420	16	16	17	17	16	16

## Sheet: arg-1
Strain Name	Time	#Paralysed	#Total
N2	0	0	16
	60	0	16
	120	0	16
	180	8	16
	240	12	16
	300	14	16
	360	16	16
	420
dos-2(tm4515)	0	0	16
	60	0	16
	120	0	16
	180	3	16
	240	11	16
	300	15	16
	360	16	16
	420

## Sheet: dsl-1
Strain Name	Time	#Paralysed	#Total	#Paralysed	#Total
N2	0	0	14	0	16
	60	0	14	0	16
	120	3	14	0	16
	180	6	14	8	16
	240	9	14	12	16
	300	12	14	14	16
	360	12	14	16	16
	420	12	14
dsl-1	0	0	13
	60	0	13	0	16
	120	4	13	0	16
	180	6	13	1	16
	240	8	13	9	16
	300	11	13	11	16
	360	11	13	13	16
	420	11	13	16	16

## Sheet: dsl-2
Strain Name	Time	#Paralysed	#Total
N2	0	0	12
	60	0	12
	120	0	12
	180	1	12
	240	6	12
	300	8	12
	360	10	12
	420
dsl-2	0	0	16
	60	0	16
	120	0	16
	180	2	16
	240	9	16
	300	11	16
	360	12	16
	420

## Sheet: dsl-4 and dsl-5
Strain Name	Time	#Paralysed	#Total
N2	0	0	10
	60	0	10
	120	2	10
	180	7	10
	240	8	10
	300	9	10
	360	10	10
	420
dsl-4	0	0	15
	60	0	15
	120	3	15
	180	10	15
	240	12	15
	300	12	15
	360	12	15
	420	15	15
dsl-5	0	0	14
	60	0	14
	120	3	14
	180	9	14
	240	11	14
	300	12	14
	360	13	14
	420	14	14

## Sheet: RNAi
RNAi	Time	#Paralysed	#Total	#Paralysed	#Total	#Paralysed	#Total	#Paralysed	#Total
pL4440	0	0	16	0	16	0	16	0	16
	60	0	16	0	15	0	16	0	16
	120	0	16	1	13	0	16	1	16
	180	5	16	5	13	3	16	1	16
	240	8	16	7	13	6	16	4	16
	300	9	16	8	13	8	16	5	16
	360	10	16	12	13	11	16	7	16
	420	12	16	13	13	13	16	8	16
apx-1	0	0	16	0	16	0	16
	60	0	16	0	16	0	16
	120	1	16	1	16	0	16
	180	6	16	3	16	6	16
	240	7	16	6	16	9	16
	300	11	16	8	16	9	16
	360	11	16	10	16	9	16
	420	12	16	12	16	12	16
dos-3	0			0	16	0	16	0	16
	60			0	16	0	16	0	16
	120			4	15	0	16	0	16
	180			6	15	3	16	3	15
	240			8	15	9	16	8	15
	300			9	15	9	16	9	15
	360			10	15	10	16	10	15
	420			11	15	12	16	11	15
dsl-7	0			0	15	0	16	0	16
	60			0	15	0	16	0	16
	120			1	15	0	16	0	16
	180			5	15	1	16	1	16
	240			8	15	10	16	7	16
	300			9	15	11	16	8	16
	360			12	15	13	16	11	16
	420			14	15	13	16	12	16
